# Supplementary material for: Elucidation of master allostery essential for circadian clock oscillation in cyanobacteria
Source: PubMed Central journal article supplement — Sci Adv. 2022 Apr 15;8(15):eabm8990. doi: 10.1126/sciadv.abm8990 (PMC9012456; doi:10.1126/sciadv.abm8990), 2022-04-15
Supplement: sciadv.abm8990_sm.pdf [file sciadv.abm8990_sm.pdf]

Supplementary Materials for  
**Elucidation of master allostery essential for circadian clock oscillation  
in cyanobacteria**

Yoshihiko Furuike\*, Atsushi Mukaiyama, Dongyan Ouyang, Kumiko Ito-Miwa, Damien Simon,  
Eiki Yamashita, Takao Kondo, Shuji Akiyama\*

\*Corresponding author. Email: [furuike@ims.ac.jp](mailto:furuike@ims.ac.jp) (Y.F.); [akiyamas@ims.ac.jp](mailto:akiyamas@ims.ac.jp) (S.A.)

Published 15 April 2022, *Sci. Adv.* **8**, eabm8990 (2022)  
DOI: 10.1126/sciadv.abm8990

**This PDF file includes:**

Supplementary Text  
Figs. S1 to S4  
Table S1  
References

## Supplementary Text

### Selection of non-phosphorylatable amino acids upon designing phospho-mimicking mutants

Phosphorylatable amino acids, such as serine and threonine, are often substituted with alanine to investigate the functional effects of those phosphoryl modifications. A S431A/T432A KaiC double mutant (KaiC-AA) was used as a phospho-mimic mutant of KaiC-ST (21). However, as reported previously (46), alanine substitutions at both or either of the dual phosphorylation sites (S431A or T432A) resulted in much higher ATPase activity ( $25.7 \text{ ATP d}^{-1}$  for KaiC-AA) than that observed for fully dephosphorylated KaiC-ST ( $13.6 \pm 1.4 \text{ ATP d}^{-1}$ ) (fig. S2C). By contrast, KaiC-SV is designed to reduce these unwanted side effects by selecting valine instead of alanine because valine has the closest volume (fig. S2A) and topology (fig. S2B) to threonine. KaiC-SV, which has a helical P<sub>Sw</sub> (upper left panel of **Fig. 2**) and similar ATPase activity ( $13.3 \pm 0.7 \text{ ATP d}^{-1}$ ) to KaiC-ST (fig. S2C), exhibits temperature-compensated ATPase- (**Fig. 4B**) and mono-P-cycles (**Fig. 4A**) that are in sharp contrast to the arrhythmicity observed for KaiC-SA and KaiC-AT (fig. S2C). KaiC-CT was designed using the same logic described above to generate a mutant with ATPase activity ( $9.9 \pm 0.7 \text{ ATP d}^{-1}$ ) that does not exceed that of KaiC-ST but also exhibits arrhythmicity (**Fig. 4A**). The present results clearly indicate that S431 is the primary residue responsible for CI–CII allostery affecting rhythmicity and that special care must sometimes be taken when replacing phosphorylatable amino acids with non-phosphorylatable ones.

### Assembly and disassembly dynamics for the KaiA/KaiB/KaiC-pSV ternary complex

After reconstructing the *in vitro* P-cycle for KaiC-SV (fig. S3A), every aliquot taken at a time interval of 13 h was used for size-exclusion chromatography and RALS analyses. When maximally phosphorylated (fig. S3B), KaiC-pSV weakly binds to KaiB. The KaiA/KaiB/KaiC-pSV ternary complex (8, 9) begins to form at a dephosphorylating state (fig. S3C), and its accumulation peaks at the maximally dephosphorylated state (fig. S3D). The populated ternary complex is disassembled at a phosphorylating state (fig. S3E). KaiC-SV exhibits minimal allostery to achieve system-level synchronization via KaiA sequestration (22, 24) and to drive the assembly–disassembly cycle of the Kai proteins.

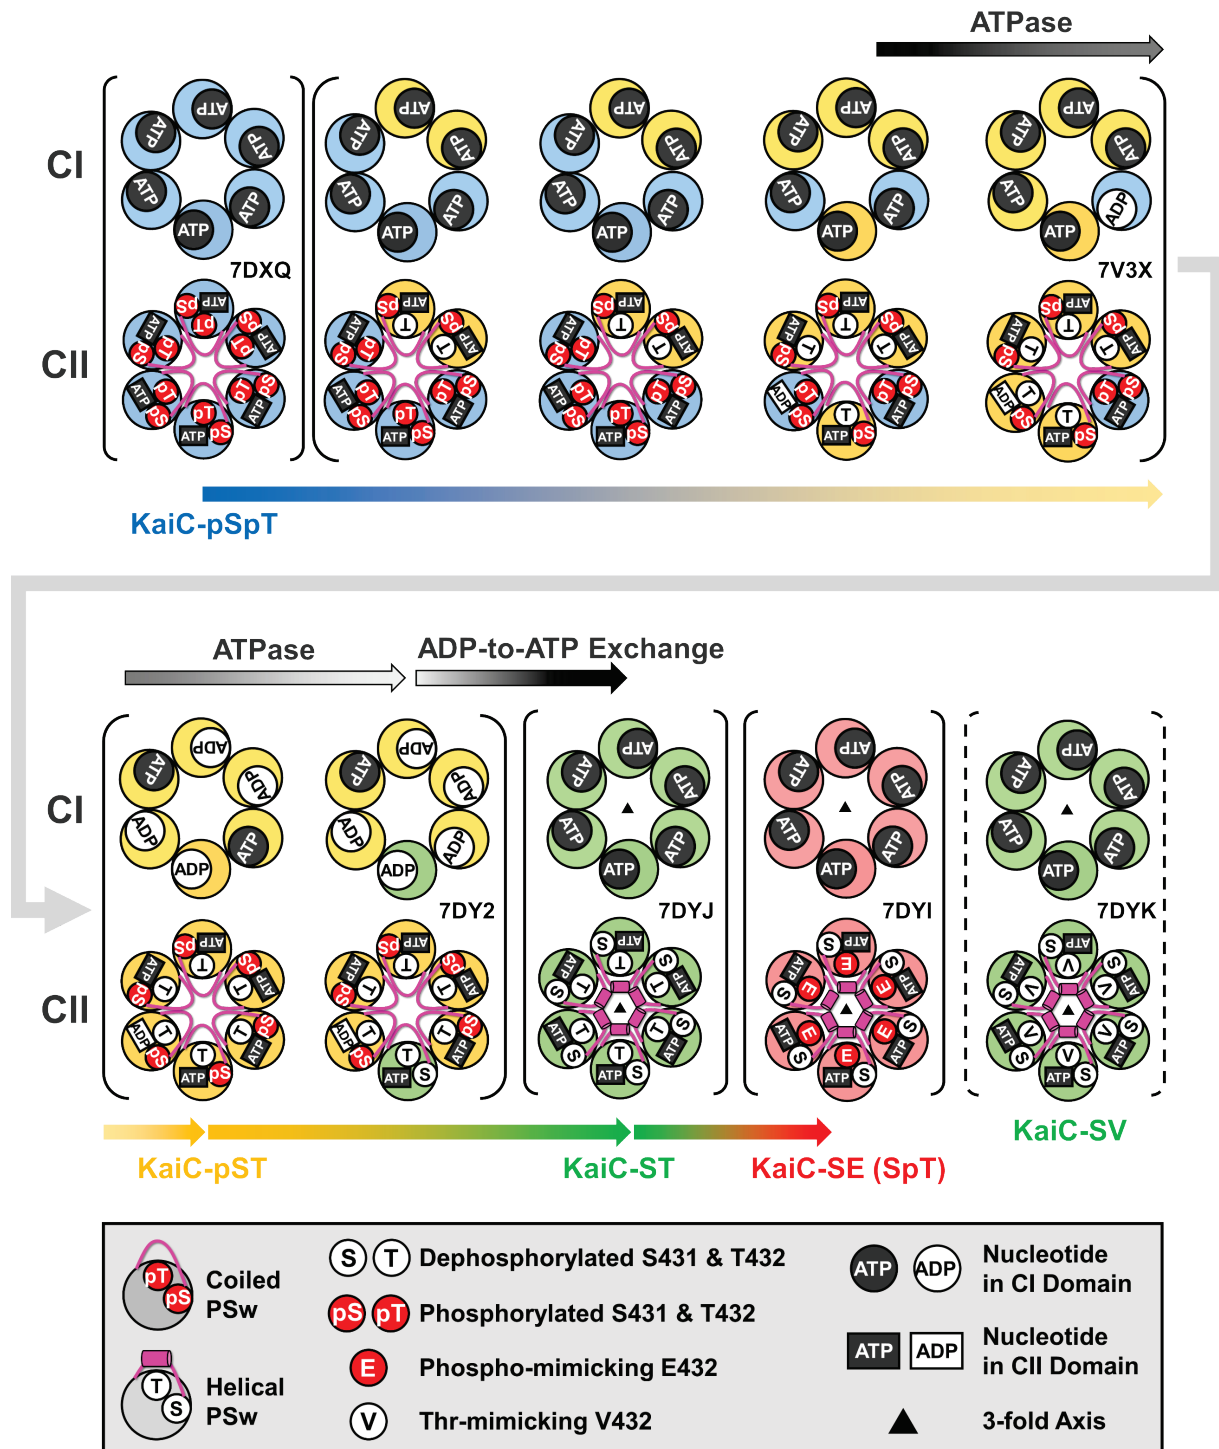

**Fig. S1. Schematic drawing of the crystal structure library.**

Five crystallographic data sets (in solid parentheses) are aligned in the following order: 7DXQ (a hexamer of KaiC-pSpT in  $P2_12_12_1$ ), 7V3X (four hexamers of partial KaiC-pSpT and KaiC-pST in  $P2_1$ ), 7DY2 (two hexamers of KaiC-pST and partial KaiC-ST in  $P2_1$ ), 7DYJ (a hexamer of KaiC-ST reconstructed in  $P6_3$ ), and 7DYI (a hexamer of KaiC-SE reconstructed in  $P6_3$ ) with annotations in the box below the alignment. KaiC-SV, a mono-P-cycle oscillator, is coded as

7DYK and drawn as a hexamer according to the  $P6_3$  space group in dashed parentheses. The filled triangles in 7DYJ, 7DYI, and 7DYK indicate the crystallographic three-fold axes present at the centers of the hexamers. Arrows above and below the hexameric rings represent biochemical events in the CI domain and phosphorylation-state transitions in the CII domain, respectively.

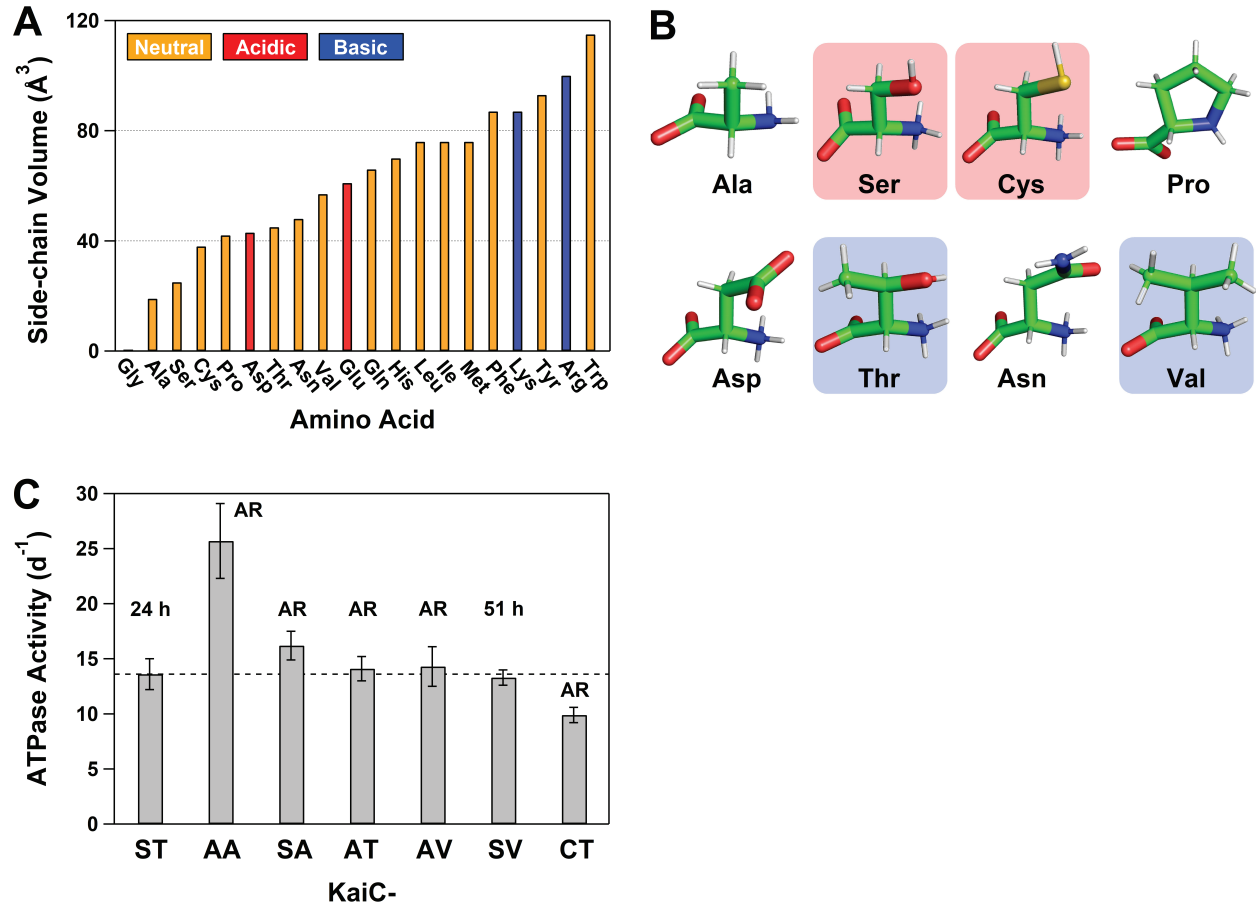

**Fig. S2. Candidate amino acid substitutions at dual phosphorylation sites.**

(A) Side-chain volume and (B) topology of amino acid residues. (C) Steady-state ATPase activity at 30°C. Values and AR above the error bars indicate the period length or arrhythmicity, respectively, for the *in vitro* P-cycle in the presence of KaiA and KaiB at 30°C.

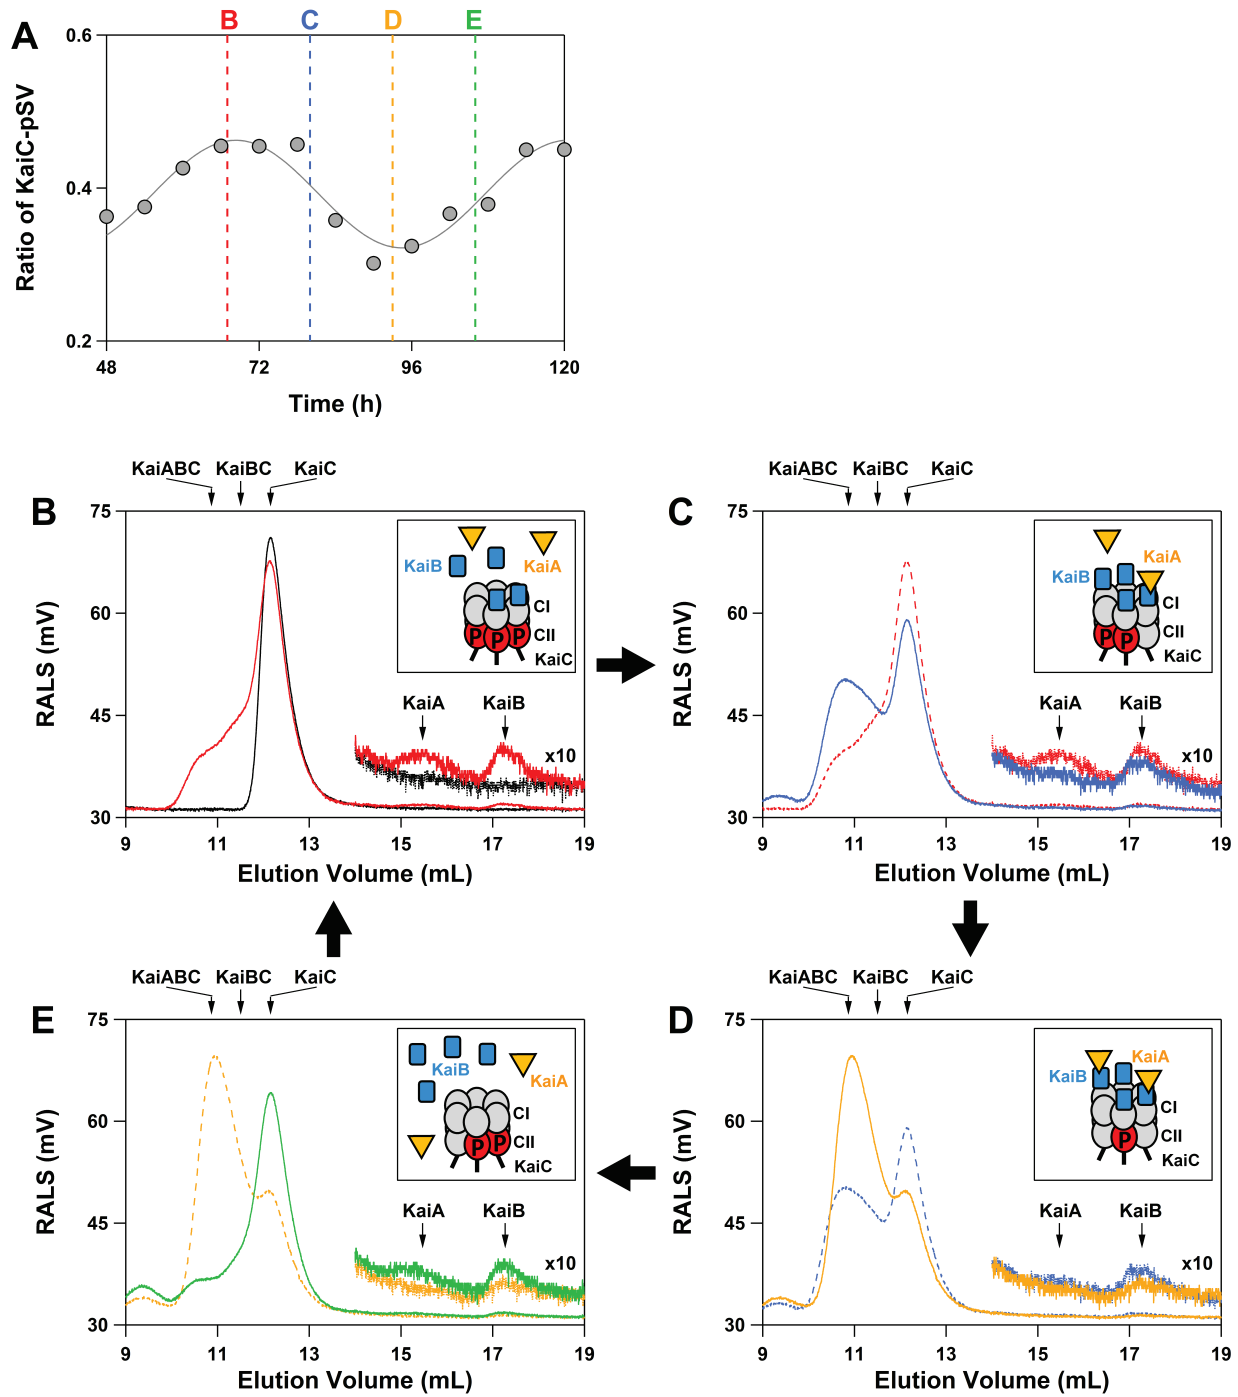

**Fig. S3. Assembly and disassembly cycle of the KaiA/KaiB/KaiC-SV ternary complex.** (A) P-cycle for KaiC-SV at 30°C. (B) Red, (C) blue, (D) orange, and (E) green solid lines correspond to the elution curves for aliquots taken at 67, 80, 93, and 106 h, respectively. Molecular masses of proteins in the eluted fractions were analyzed using right-angle light scattering (RALS). The black solid line depicts the elution curve for KaiC-SV alone. For reference, elution curves for the aliquots taken at 67, 80, and 93 h are shown using red, blue, and orange dotted lines, respectively. The insets correspond to schematic illustrations of the assembled and disassembled states of the ternary complex.

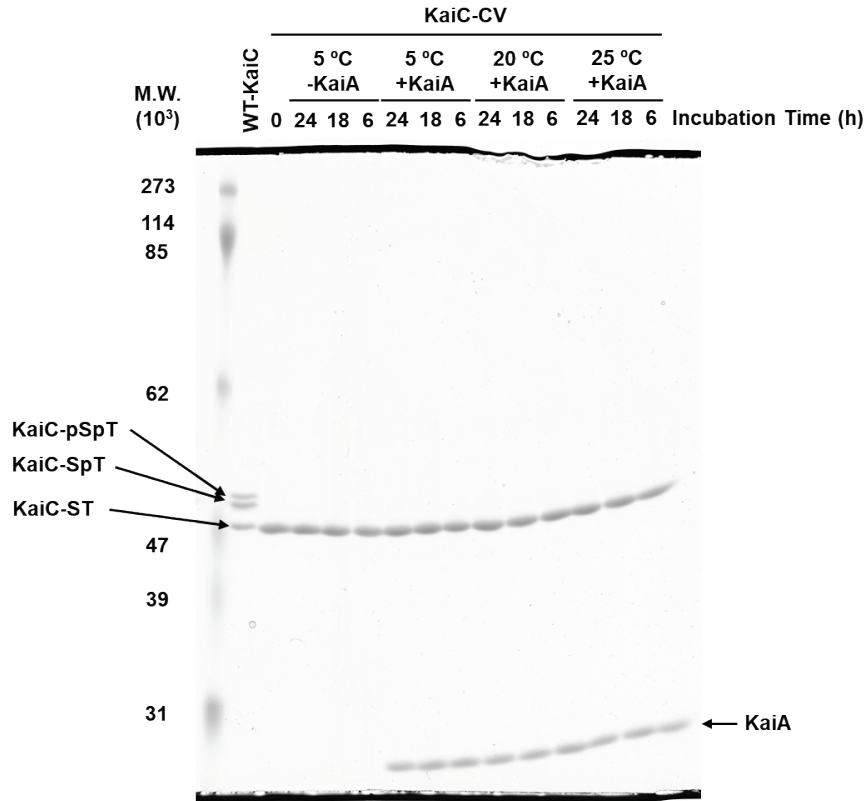

**Fig. S4. SDS-PAGE analysis of the S431C/T432V mutant (KaiC-CV) at 5, 20, and 25 °C with or without KaiA.**

The possibility of KaiC-CV (0.2 mg/mL, 3.4 μM) being auto-phosphorylated was examined by lowering temperature and by increasing the concentration of KaiA. Note that the final concentration of KaiA (0.12 mg/mL, 3.7 μM) was three-fold higher than the standard concentration (0.04 mg/mL) for the *in vitro* P-cycle assay.

**Table S1. Data collection and refinement statistics.**

| Protein                                                                                                                                                                                                                                               | KaiC-pSpT              | KaiC-pSpT&pST          | KaiC-pST               | KaiC-ST                | KaiC-SE                  | KaiC-SV                  |
|-------------------------------------------------------------------------------------------------------------------------------------------------------------------------------------------------------------------------------------------------------|------------------------|------------------------|------------------------|------------------------|--------------------------|--------------------------|
| <b>Data Collection</b>                                                                                                                                                                                                                                |                        |                        |                        |                        |                          |                          |
| Space group                                                                                                                                                                                                                                           | $P2_12_12_1$           | $P2_1$                 | $P2_1$                 | $P6_3$                 | $P6_3$                   | $P6_3$                   |
| Unit cell parameters                                                                                                                                                                                                                                  |                        |                        |                        |                        |                          |                          |
| $a, b, c$ (Å)                                                                                                                                                                                                                                         | 92.4, 159.9, 207.24    | 185.5, 205.8, 186.2    | 92.8, 206.6, 168.4     | 94.6, 94.6, 179.9      | 94.3, 94.3, 180.6        | 94.9, 94.9, 180.6        |
| $\alpha, \beta, \gamma$ (°)                                                                                                                                                                                                                           | 90, 90, 90             | 90, 115.1, 90          | 90, 94.7, 90           | 90, 90, 120            | 90, 90, 120              | 90, 90, 120              |
| Wavelength (Å)                                                                                                                                                                                                                                        | 0.9                    | 0.9                    | 0.9                    | 0.9                    | 0.9                      | 0.9                      |
| Resolution range (Å) <sup>a</sup>                                                                                                                                                                                                                     | 30-2.80<br>(2.90-2.80) | 50-3.10<br>(3.15-3.10) | 50-3.04<br>(3.15-3.04) | 30-2.40<br>(2.44-2.40) | 48.5-2.64<br>(2.77-2.64) | 48.5-3.00<br>(3.11-3.00) |
| Total reflections                                                                                                                                                                                                                                     | 561605                 | 883423                 | 457569                 | 507210                 | 280978                   | 191896                   |
| Unique reflections                                                                                                                                                                                                                                    | 75955 (7451)           | 228464 (11426)         | 120308 (12016)         | 35578 (1775)           | 26712 (3551)             | 19313 (1788)             |
| Redundancy                                                                                                                                                                                                                                            | 7.4 (7.3)              | 3.9 (3.8)              | 3.8 (3.8)              | 14.3 (14.1)            | 10.5 (10.4)              | 10.4 (10.8)              |
| Completeness (%)                                                                                                                                                                                                                                      | 99.9 (100)             | 99.9 (100)             | 99.9 (100)             | 100 (99.8)             | 99.9 (99.9)              | 99.7 (98.2)              |
| $R_{\text{merge}}$ (%) <sup>b</sup>                                                                                                                                                                                                                   | 9.2 (>100)             | 10.2 (74.4)            | 13.3 (89.9)            | 27.0 (>100)            | 10.9 (>100)              | 13.8 (96.2)              |
| (I)/ $\sigma$ (I)                                                                                                                                                                                                                                     | 21.4 (2.0)             | 13.8 (2.1)             | 15.6 (2.0)             | 36.4 (2.7)             | 13.2 (2.1)               | 12.9 (2.8)               |
| <b>Model building</b>                                                                                                                                                                                                                                 |                        |                        |                        |                        |                          |                          |
| Molecular replacement                                                                                                                                                                                                                                 | 2GBL                   | 2GBL                   | 2GBL                   | 2GBL                   | 2GBL                     | 7DYJ                     |
| Total atoms                                                                                                                                                                                                                                           | 21020                  | 78739                  | 39277                  | 6837                   | 6669                     | 6705                     |
| Protien                                                                                                                                                                                                                                               | 20538                  | 77135                  | 38547                  | 6653                   | 6510                     | 6564                     |
| Ligands                                                                                                                                                                                                                                               | 384                    | 1512                   | 712                    | 128                    | 128                      | 128                      |
| Water                                                                                                                                                                                                                                                 | 98                     | 92                     | 18                     | 56                     | 31                       | 13                       |
| $R_{\text{work}}$ (%) <sup>c</sup>                                                                                                                                                                                                                    | 25.0                   | 27.5                   | 26.3                   | 26.7                   | 29.4                     | 27.4                     |
| $R_{\text{free}}$ (%) <sup>c</sup>                                                                                                                                                                                                                    | 31.8                   | 34.0                   | 32.6                   | 31.0                   | 33.1                     | 32.8                     |
| R.M.S.D. from ideality                                                                                                                                                                                                                                |                        |                        |                        |                        |                          |                          |
| Bond length (Å)                                                                                                                                                                                                                                       | 0.002                  | 0.006                  | 0.002                  | 0.002                  | 0.002                    | 0.002                    |
| Bond angles (°)                                                                                                                                                                                                                                       | 1.2                    | 1.5                    | 1.2                    | 1.25                   | 1.2                      | 1.2                      |
| Average B factors (Å <sup>2</sup> )                                                                                                                                                                                                                   | 45.7                   | 58.0                   | 47.0                   | 58.4                   | 70.2                     | 72.7                     |
| Rmchandran plot                                                                                                                                                                                                                                       |                        |                        |                        |                        |                          |                          |
| Most favored (%)                                                                                                                                                                                                                                      | 82.6                   | 92.2                   | 82.3                   | 86.9                   | 84.5                     | 84.2                     |
| Allowed (%)                                                                                                                                                                                                                                           | 16.8                   | 6.3                    | 17.5                   | 12.8                   | 15.6                     | 15.6                     |
| Disallowed (%)                                                                                                                                                                                                                                        | 0.6                    | 1.4                    | 0.2                    | 0.2                    | 0.0                      | 0.1                      |
| <b>PDB code</b>                                                                                                                                                                                                                                       | 7DXQ                   | 7V3X                   | 7DY2                   | 7DYJ                   | 7DYI                     | 7DYK                     |
| <sup>a</sup> Values in parentheses are for the highest-resolution shell.                                                                                                                                                                              |                        |                        |                        |                        |                          |                          |
| <sup>b</sup> $R_{\text{merge}} = \frac{\sum  I - \langle I \rangle }{\sum I}$ , where I corresponds to the observed intensity of reflections.                                                                                                         |                        |                        |                        |                        |                          |                          |
| <sup>c</sup> $R_{\text{work, free}} = \frac{\sum  F_{\text{obs}} - F_{\text{calc}} }{\sum  F_{\text{obs}} }$ . $R_{\text{free}}$ is the cross-validation of the R-factor using the test reflections, 5% of the data, not included in the refinements. |                        |                        |                        |                        |                          |                          |



## REFERENCES AND NOTES

1. A. Goldbeter, G. Dupont, Allosteric regulation, cooperativity, and biochemical oscillations. *Biophys. Chem.* **37**, 341–353 (1990).
2. B. C. Goodwin, Oscillatory behavior in enzymatic control processes. *Adv. Enzyme Regul.* **3**, 425–437 (1965).
3. R. Narasimamurthy, S. R. Hunt, Y. N. Lu, J. M. Fustin, H. Okamura, C. L. Partch, D. B. Forger, J. K. Kim, D. M. Virshup, CK1 $\delta/\epsilon$  protein kinase primes the PER2 circadian phosphoswitch. *Proc. Natl. Acad. Sci. U.S.A.* **115**, 5986–5991 (2018).
4. R. Narasimamurthy, D. M. Virshup, The phosphorylation switch that regulates ticking of the circadian clock. *Mol. Cell* **81**, 1133–1146 (2021).
5. C. L. Partch, Orchestration of circadian timing by macromolecular protein assemblies. *J. Mol. Biol.* **432**, 3426–3448 (2020).
6. A. Upadhyay, D. Marzoll, A. Diernfellner, M. Brunner, H. Herzog, Multiple random phosphorylations in clock proteins provide long delays and switches. *Sci. Rep.* **10**, 22224 (2020).
7. A. C. R. Diernfellner, M. Brunner, Phosphorylation timers in the neurospora crassa circadian clock. *J. Mol. Biol.* **432**, 3449–3465 (2020).
8. J. Snijder, J. M. Schuller, A. Wiegand, P. Lossl, N. Schmelling, I. M. Axmann, J. M. Plitzko, F. Forster, A. J. R. Heck, Structures of the cyanobacterial circadian oscillator frozen in a fully assembled state. *Science* **355**, 1181–1184 (2017).
9. R. Tseng, N. F. Goularte, A. Chavan, J. Luu, S. E. Cohen, Y. G. Chang, J. Heisler, S. Li, A. K. Michael, S. Tripathi, S. S. Golden, A. LiWang, C. L. Partch, Structural basis of the day-night transition in a bacterial circadian clock. *Science* **355**, 1174–1180 (2017).
10. H. Q. Yamaguchi, K. L. Ode, H. R. Ueda, A design principle for posttranslational chaotic oscillators. *Science* **24**, 101946 (2021).

11. J. Abe, T. B. Hiyama, A. Mukaiyama, S. Son, T. Mori, S. Saito, M. Osako, J. Wolanin, E. Yamashita, T. Kondo, S. Akiyama, Atomic-scale origins of slowness in the cyanobacterial circadian clock. *Science* **349**, 312–316 (2015).
12. R. P. Aryal, P. B. Kwak, A. G. Tamayo, M. Gebert, P. L. Chiu, T. Walz, C. J. Weitz, Macromolecular assemblies of the mammalian circadian clock. *Mol. Cell* **67**, 770–782.e6 (2017).
13. Y. Murayama, A. Mukaiyama, K. Imai, Y. Onoue, A. Tsunoda, A. Nohara, T. Ishida, Y. Maeda, K. Terauchi, T. Kondo, S. Akiyama, Tracking and visualizing the circadian ticking of the cyanobacterial clock protein KaiC in solution. *EMBO J.* **30**, 68–78 (2011).
14. R. Pattanayek, J. M. Wang, T. Mori, X. Yao, C. H. Johnson, M. Egli, Visualizing a circadian clock protein: Crystal structure of KaiC and functional insights. *Mol. Cell* **15**, 375–388 (2004).
15. R. Pattanayek, Y. Xu, A. Lamichhane, C. H. Johnson, M. Egli, An arginine tetrad as mediator of input-dependent and input-independent ATPases in the clock protein KaiC. *Acta Crystallog. D Biol. Crystallogr.* **70**, 1375–1390 (2014).
16. M. Ishiura, S. Kutsuna, S. Aoki, H. Iwasaki, C. R. Andersson, A. Tanabe, S. S. Golden, C. H. Johnson, T. Kondo, Expression of a gene cluster kaiABC as a circadian feedback process in cyanobacteria. *Science* **281**, 1519–1523 (1998).
17. T. Nishiwaki, Y. Satomi, Y. Kitayama, K. Terauchi, R. Kiyohara, T. Takao, T. Kondo, A sequential program of dual phosphorylation of KaiC as a basis for circadian rhythm in cyanobacteria. *EMBO J.* **26**, 4029–4037 (2007).
18. M. J. Rust, J. S. Markson, W. S. Lane, D. S. Fisher, E. K. O'Shea, Ordered phosphorylation governs oscillation of a three-protein circadian clock. *Science* **318**, 809–812 (2007).
19. M. Nakajima, K. Imai, H. Ito, T. Nishiwaki, Y. Murayama, H. Iwasaki, T. Oyarna, T. Kondo, Reconstitution of circadian oscillation of cyanobacterial KaiC phosphorylation in vitro. *Science* **308**, 414–415 (2005).

20. J. Tomita, M. Nakajima, T. Kondo, H. Iwasaki, No transcription-translation feedback in circadian rhythm of KaiC phosphorylation. *Science* **307**, 251–254 (2005).
21. T. Nishiwaki, Y. Satomi, M. Nakajima, C. Lee, R. Kiyohara, H. Kageyama, Y. Kitayama, M. Temamoto, A. Yamaguchi, A. Hijikata, M. Go, H. Iwasaki, T. Takao, T. Kondo, Role of KaiC phosphorylation in the circadian clock system of *Synechococcus elongatus* PCC 7942. *Proc. Natl. Acad. Sci. U.S.A.* **101**, 13927–13932 (2004).
22. T. S. Hatakeyama, K. Kaneko, Generic temperature compensation of biological clocks by autonomous regulation of catalyst concentration. *Proc. Natl. Acad. Sci. U.S.A.* **109**, 8109–8114 (2012).
23. M. Sasai, Mechanism of autonomous synchronization of the circadian KaiABC rhythm. *Sci. Rep.* **11**, 4713 (2021).
24. J. S. van Zon, D. K. Lubensky, P. R. H. Altena, P. R. ten Wolde, An allosteric model of circadian KaiC phosphorylation. *Proc. Natl. Acad. Sci. U.S.A.* **104**, 7420–7425 (2007).
25. K. Terauchi, Y. Kitayama, T. Nishiwaki, K. Miwa, Y. Murayama, T. Oyama, T. Kondo, ATPase activity of KaiC determines the basic timing for circadian clock of cyanobacteria. *Proc. Natl. Acad. Sci. U.S.A.* **104**, 16377–16381 (2007).
26. K. Ito-Miwa, Y. Furuike, S. Akiyama, T. Kondo, Tuning the circadian period of cyanobacteria up to 6.6 days by the single amino acid substitutions in KaiC. *Proc. Natl. Acad. Sci. U.S.A.* **117**, 20926–20931 (2020).
27. D. Y. Ouyang, Y. Furuike, A. Mukaiyama, K. Ito-Miwa, T. Kondo, S. Akiyama, Development and optimization of expression, purification, and ATPase assay of KaiC for medium-throughput screening of circadian clock mutants in cyanobacteria. *Int. J. Mol. Sci.* **20**, 2789 (2019).
28. N. M. Schmelling, R. Lehmann, P. Chaudhury, C. Beck, S. V. Albers, I. M. Axmann, A. Wiegand, Minimal tool set for a prokaryotic circadian clock. *BMC Evol. Biol.* **17**, 169 (2017).

29. Y. G. Chang, R. Tseng, N. W. Kuo, A. LiWang, Rhythmic ring-ring stacking drives the circadian oscillator clockwise. *Proc. Natl. Acad. Sci. U.S.A.* **109**, 16847–16851 (2012).
30. R. Tseng, Y. G. Chang, I. Bravo, R. Latham, A. Chaudhary, N. W. Kuo, A. LiWang, Cooperative KaiA-KaiB-KaiC interactions affect KaiB/SasA competition in the circadian clock of cyanobacteria. *J. Mol. Biol.* **426**, 389–402 (2014).
31. J. Lin, J. Chew, U. Chockanathan, M. J. Rust, Mixtures of opposing phosphorylations within hexamers precisely time feedback in the cyanobacterial circadian clock. *Proc. Natl. Acad. Sci. U.S.A.* **111**, E3937–E3945 (2014).
32. M. Egli, R. Pattanayek, J. H. Sheehan, Y. Xu, T. Mori, J. A. Smith, C. H. Johnson, Loop-loop interactions regulate KaiA-stimulated KaiC phosphorylation in the cyanobacterial KaiABC circadian clock. *Biochemistry* **52**, 1208–1220 (2013).
33. R. Pattanayek, T. Mori, Y. Xu, S. Pattanayek, C. H. Johnson, M. Egli, Structures of KaiC circadian clock mutant proteins: A new phosphorylation site at T426 and mechanisms of kinase, ATPase and phosphatase. *PLOS ONE* **4**, e7529 (2009).
34. Y. Xu, T. Mori, X. Qin, H. Yan, M. Egli, C. H. Johnson, Intramolecular regulation of phosphorylation status of the circadian clock protein KaiC. *PLOS ONE* **4**, e7509 (2009).
35. D. Angeli, E. D. Sontag, Translation-invariant monotone systems, and a global convergence result for enzymatic futile cycles. *Nonlinear Anal. Real World Appl.* **9**, 128–140 (2008).
36. C. C. Jolley, K. L. Ode, H. R. Ueda, A design principle for a posttranslational biochemical oscillator. *Cell Rep.* **2**, 938–950 (2012).
37. A. Mukaiyama, D. Y. Ouyang, Y. Furuike, S. Akiyama, KaiC from a cyanobacterium *Gloeocapsa* sp. PCC 7428 retains functional and structural properties required as the core of circadian clock system. *Int. J. Biol. Macromol.* **131**, 67–73 (2019).
38. T. Kondo, N. F. Tsinoremas, S. S. Golden, C. H. Johnson, S. Kutsuna, M. Ishiura, Circadian clock mutants of cyanobacteria. *Science* **266**, 1233–1236 (1994).

39. Y. Furuike, J. Abe, A. Mukaiyama, S. Akiyama, Accelerating in vitro studies on circadian clock systems using an automated sampling device. *Biophys. Physicobiol.* **13**, 235–241 (2016).
40. Z. Otwinowski, W. Minor, [20] Processing of x-ray diffraction data collected in oscillation mode. *Methods Enzymol.* **276**, 307–326 (1997).
41. W. Kabsch, XDS. *Acta Crystallogr. D* **66**, 125–132 (2010).
42. R. Pattanayek, D. R. Williams, S. Pattanayek, Y. Xu, T. Mori, C. H. Johnson, P. L. Stewart, M. Egli, Analysis of KaiA-KaiC protein interactions in the cyano-bacterial circadian clock using hybrid structural methods. *EMBO J.* **25**, 2017–2028 (2006).
43. A. Vagin, A. Teplyakov, MOLREP: An automated program for molecular replacement. *J. Appl. Cryst.* **30**, 1022–1025 (1997).
44. G. N. Murshudov, P. Skubak, A. A. Lebedev, N. S. Pannu, R. A. Steiner, R. A. Nicholls, M. D. Winn, F. Long, A. A. Vagin, REFMAC5 for the refinement of macromolecular crystal structures. *Acta Crystallogr. D* **67**, 355–367 (2011).
45. P. Emsley, B. Lohkamp, W. G. Scott, K. Cowtan, Features and development of Coot. *Acta Crystallogr. D* **66**, 486–501 (2010).
46. K. Oyama, C. Azai, K. Nakamura, S. Tanaka, K. Terauchi, Conversion between two conformational states of KaiC is induced by ATP hydrolysis as a trigger for cyanobacterial circadian oscillation. *Sci. Rep.* **6**, 32443 (2016).
